# Supplementary material
Source: Royal Society of Chemistry journal article supplement (https://www.rsc.org/suppdata/cc/1999/2105/906566k.doc)
Supplement: Supplementary file 1 [file 906566k.doc]

**Supplementary** **data**

**A chemiluminescent catalytic antibody**

**James D. Stevenson, Anja Dietel and Neil R. Thomas***

*School of Chemistry, University of Nottingham, University Park, Nottingham, UK NG7 2RD. E-mail: neil.thomas@nottingham.ac.uk*

**Analytical** **data** **for** **hapten** **and** **substrates**

**Compound** **1.** 1H NMR (400 MHz; CD3OD) *δ* 1.5 (m, 2H C*H*2CH2CH2CO2H), 1.6–1.8 (m, 4H, C*H*2CH2CO2H, C*H*2CH2NH), 2.45 (t, 2H, *J* 7.5 Hz, C*H*2CO2H), 3.4 (t, 2 H, *J* 7.0 Hz, C*H2*NH), 7.3–8.1 (m, 9 H, aryl); 13C NMR (67.5 MHz, DMSO-*d*6) *δ* 24.3, 26.1, 29.3, 33.7, 41.0, 119.6, 123.0, 128.3, 128.5, 129.0, 129.5, 131.4, 132.1, 136.4, 151.0, 165.2, 174.5; 31P NMR (202.5 MHz, DMSO-*d*6) *δ* 11.2 (s): ES-MS (high resolution): calc. 392.1263 (*M*+); found 392.1253.

**Compound** **2.** 1H NMR (250 MHz; CDCl3) *δ* 1.1–2.0 (m, 12 H, adamantyl CH2, CH); 2.2 (s, 1 H, adamantyl CH), 3.1 (s, 1 H, adamantyl CH), 3.3 (s, 3H, OCH3), 7.2–7.8(m, 7 H, aryl), 8.2 (d, 2 H *J* 7.0 Hz, aryl H); 13C NMR(67.5 MHz, CDCl3) *δ* 25.8, 26.1, 31.4, 31.6, 32.2, 32.8, 33.0, 34.7, 36.3, 50.0, 95.3, 111.5, 122.5, 128.1, 128.4, 128.6, 129.2, 129.8, 130.8, 132.3, 133.7, 150.9, 164.9; FAB+-MS: 391 (62.1%, (M − O)+); 374 (44.3%, (M − O2)+).

**Compound** **3** 1H NMR (400 MHz; CDCl3) *δ* 1.4–1.9 (m, 12 H, adamantyl CH2, CH), 2.2 (s, 1 H, adamantyl CH), 3.1 (s, 1 H, adamantyl CH), 3.7 and 3.9, (2 m, 2 H, C*H*2OCO), 4.2 and 4.35, (2 m, 2 H, CH2OAr), 6.5–6.7 (m, 6 H, aryl), 7.1–7.7 (m, 11 H, aryl), 8.2 (d, 2H, *J* 7.6 Hz, aryl H); 13C NMR (67.5 MHz, CDCl3) *δ* 25.7, 25.9, 31.5, 31.7, 32.2, 32.8, 33.0, 34.6, 36.2, 61.5, 67.2, 95.8, 101.6, 103.1, 110.6, 111.1, 111.5, 112.1, 112.4, 123.0, 124.0, 125.2, 125.0, 126.6, 126.8, 128.2, 133.8, 135.1, 136.7, 150.9, 152.4, 153.1, 158.3, 160.5, 165.2, 170.2; FAB+-MS (high resolution); calc. 751.2543 ((*M*+H)+) found 751.2479.

**Antibody** **preparation**

Hybridoma cell lines were grown in RPMI medium (Sigma) which was supplemented with 10% fetal bovine serum (Sigma) at 37 °C in an atmosphere of 5% CO2. Cultures in exponential growth phase were left for 14 days in order to saturate the culture medium with antibody. Spent supernatant was centifuged at 400*g* for 20 minutes and clarified by passage through a 0.45 μM sterile filter. Antibodies were purified by affinity chromatography on a protein G-sepharose column (Amersham-Pharmacia). The purified antibody samples were then concentrated and exchanged into Tris buffer (50 mM, pH 9.0) using spin column centrifugation. These antibody samples were >95% pure by SDS-PAGE analysis.

**Synthetic routes to hapten 1 and substrate 3**

**Scheme 1** *Reagents and conditions*: a, BnBr (1.1 equiv.), aq. KOH (1.0 M, 2 equiv.), reflux, 20 h; b, NH2(CH2)5CO2CH3.HCl (0.8 equiv.), EDC.HCl (1.5 equiv.) and Et3N (1.0 equiv.), CH3CN, room temp., 15 h; c, H2, Pd-C, EtOAc, room temp., 24 h; d, Cl2POPh (1.1 equiv.), 1*H*-tetrazole (1.0 equiv.), Pri2NEt (2.0 equiv.), THF 0 to room temp., 4 h; e, LiBr (5 equiv.), CH3CN, reflux, 40 h; f, aq. NaOH (1.0 M), THF; g, EDC, NHS, DMF-phosphate buffer.

**Scheme 2** *Reagents and conditions*: a, 2-chloroethanol, H2SO4, reflux, 17 h; b, TBDMSCl, imidazole, DMF, room temp., 16 h; c, adamantan-2-one, TiCl3, LiAlH4, Et3N, THF, reflux, 3 h; d, Bu4NF, THF, room temp., 10 min; e, PhCOCl, DMAP, CH2Cl2, room temp., 30 min; f, NaI, acetone, reflux under N2 in dark, 4 days; g, fluorescein, Ag2O, PhH, reflux, 24 h; h, *meso*-tetraphenylporphine, O2, CH2Cl2, –10 °C, 300 W Vitalux® sunlamp.

**Fig. 1** Dixon plot for dioxetanes **2** and **3**


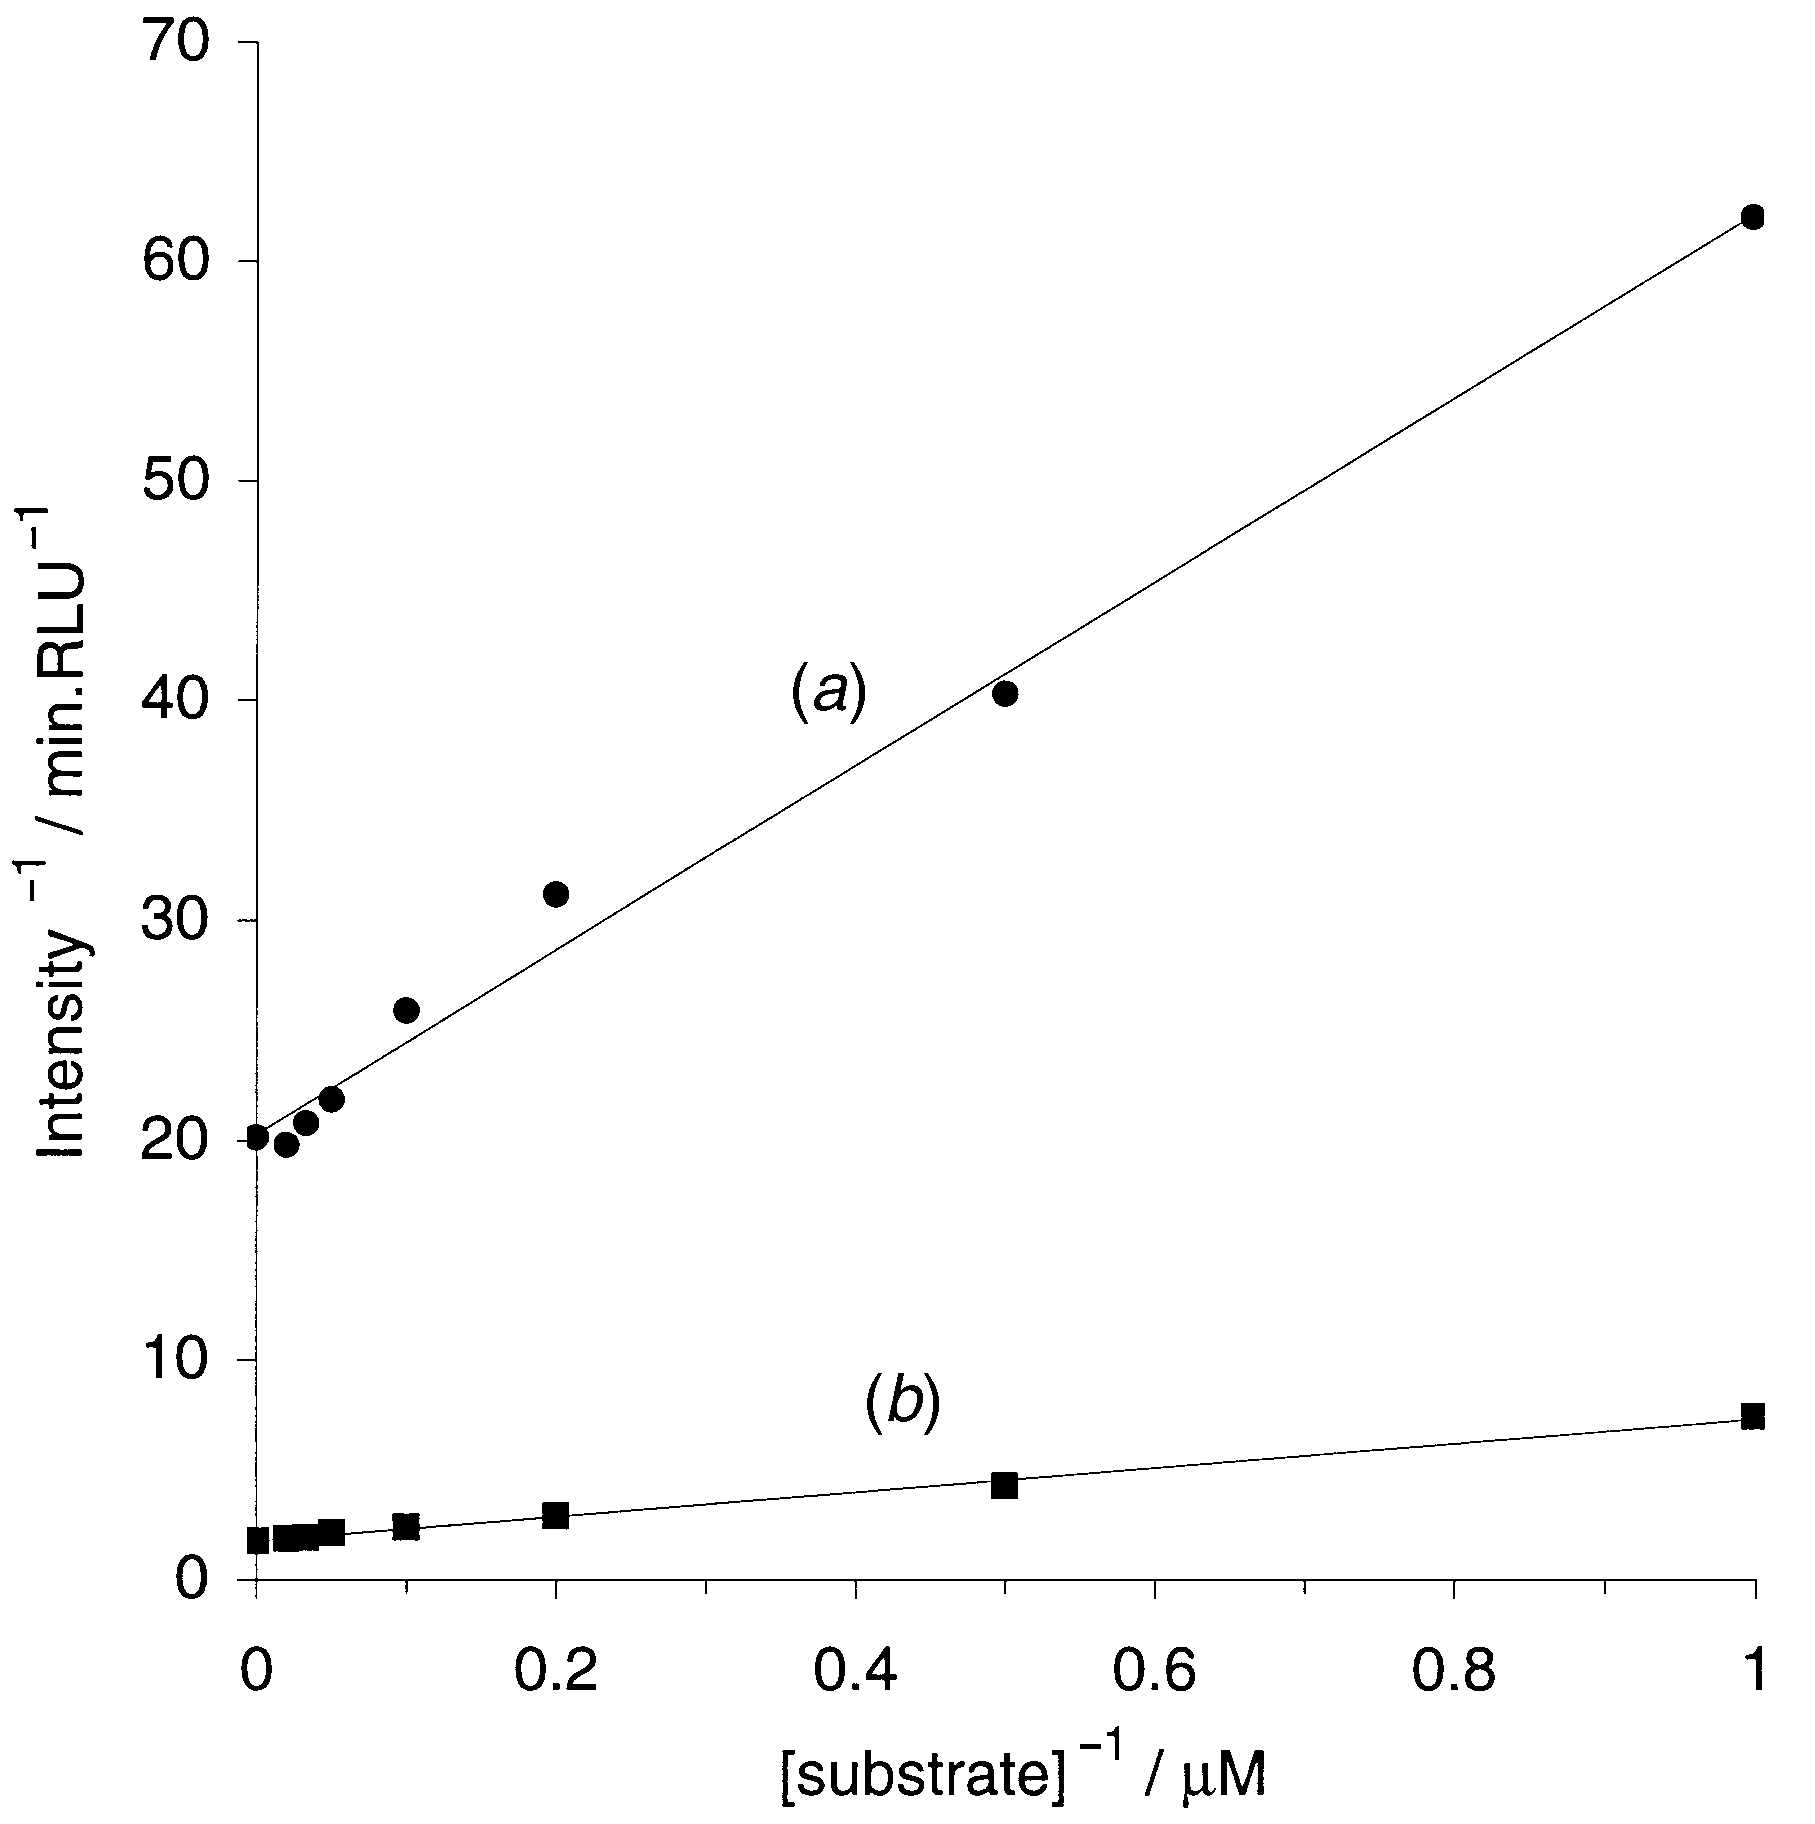


**Fig. 2** Lineweaver-Burk plots of the hydrolysis of substrates **2** and **3** in the presence of antibody 7F11: (*a*) **2** and (*b*) **3**. For reaction conditions see article.
